# Supplementary material for: Loss of diacylglycerol kinase ε causes thrombotic microangiopathy by impairing endothelial VEGFA signaling
Source: PubMed Central journal article supplement (PMC8262293; doi:10.1172/jci.insight.146959), 2021-05-10
Supplement: jciinsight-6-146959-s018.pdf [file jciinsight-6-146959-s018.pdf]

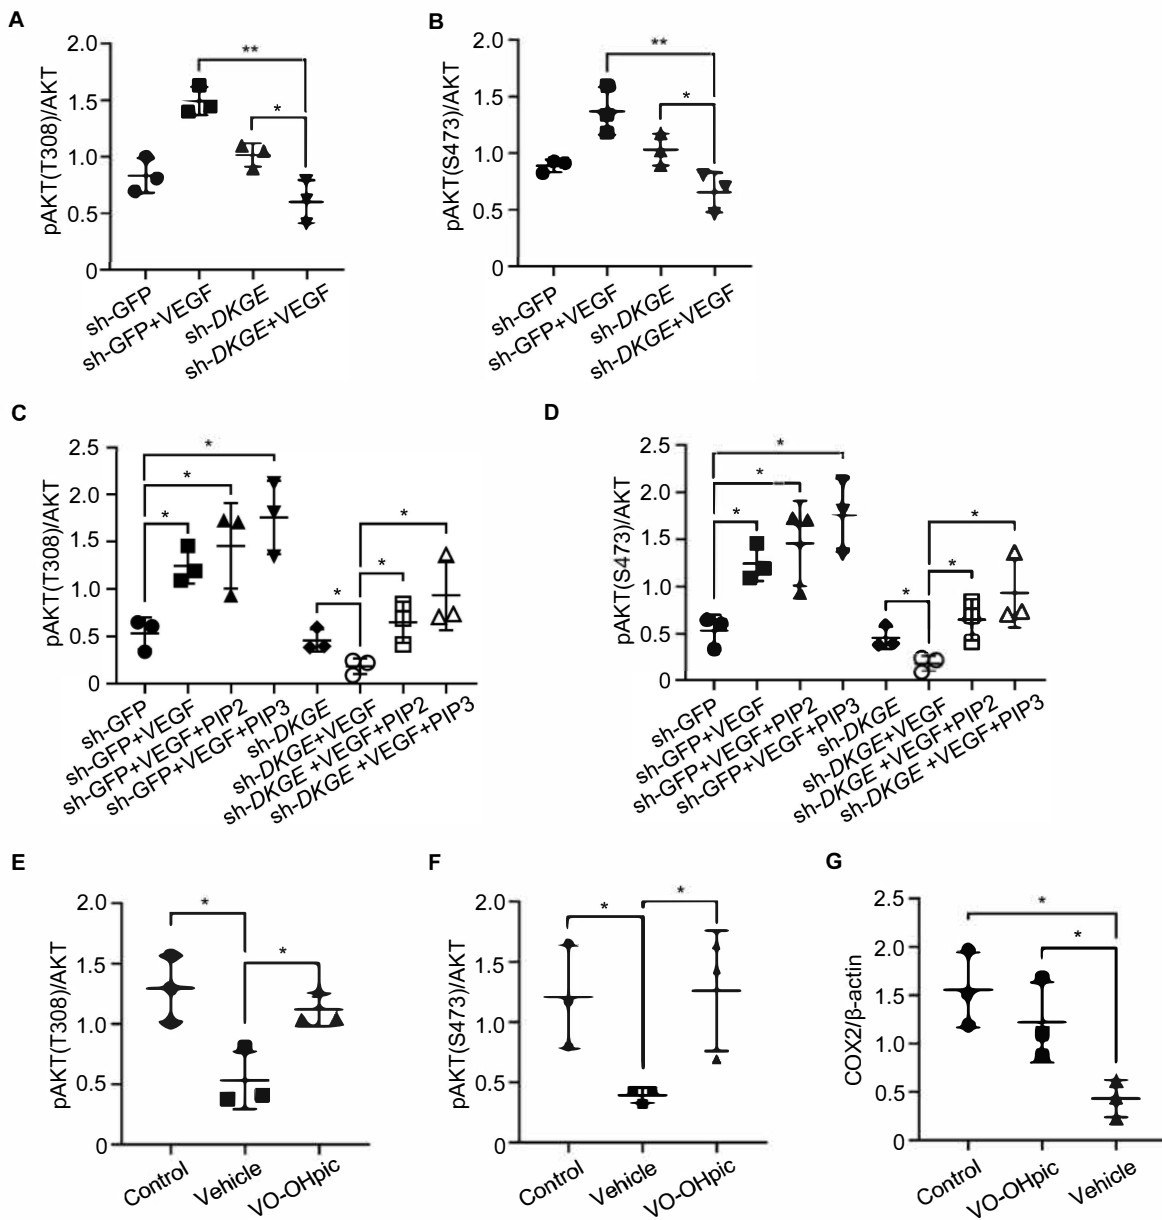

**Supplementary figure 1. Densitometric analysis of the western blots** presented in Figure 1C (A-B), in Figure 1E (C-D), Figure 3A (E-F) and Figure 3B (G). Total Akt was used as normalizer in panels A through F,  $\beta$ -actin was used in panel G. Data are presented as mean  $\pm$  SD. \*:  $P < 0.05$ . \*\*:  $P < 0.01$  (by Student's t-test).  $n = 3$  per group.

**A**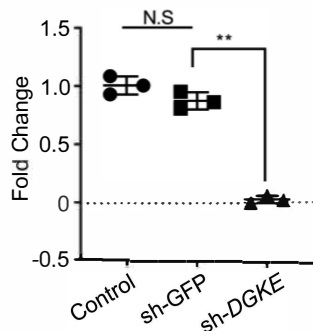**B**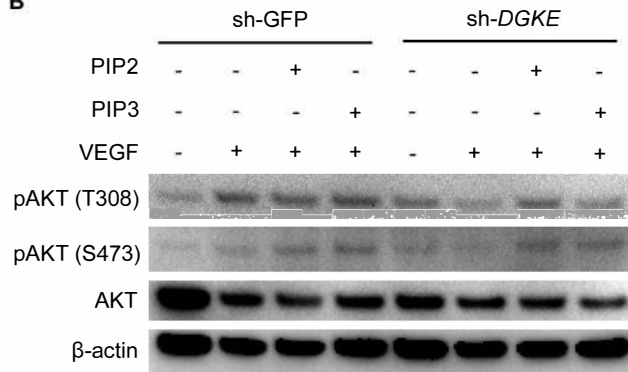**C**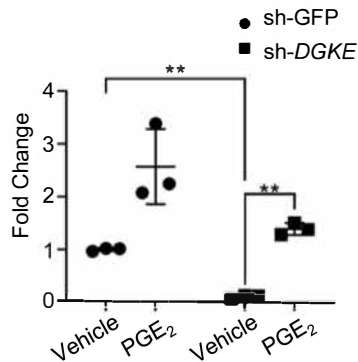**D**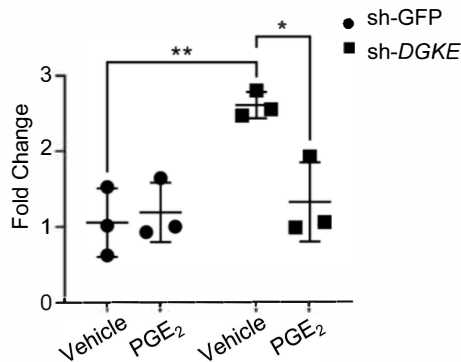

**Supplementary figure 2. A.** Efficiency of the sh-RNA knockdown in HMECs measured by Q-PCR, compared to non-targeted control (sh-GFP) cells. Controls are non-transfected cells. **B.** Western blots showing that impaired Akt activation in the sh-RNA knockdown HMECs upon VEGFA stimulation is partially reversed by PIP2 and PIP3 supplementation. mRNA expression of **C.** CXCR4 and **D.** MMP-2 in sh-DGKE HMECs and non-target control cells (sh-GFP), with or without PGE<sub>2</sub> supplementation. Data are presented as mean  $\pm$  SD. \*:  $P < 0.05$ , \*\*:  $P < 0.01$  (Student's t-test). N.S.: non-significant.  $n = 3$  per group.

**A**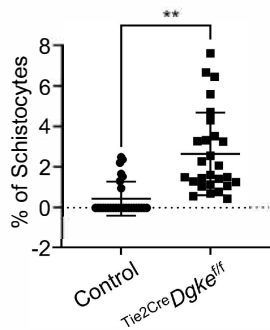**B**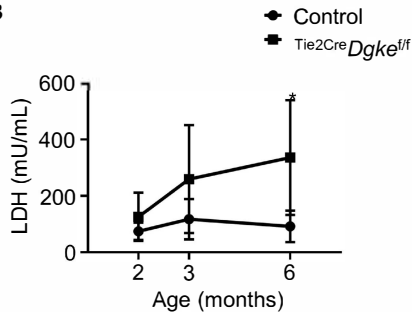**C**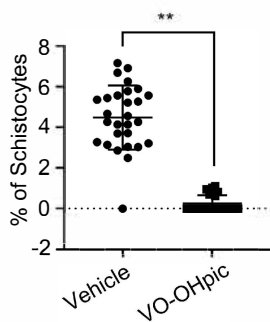**D**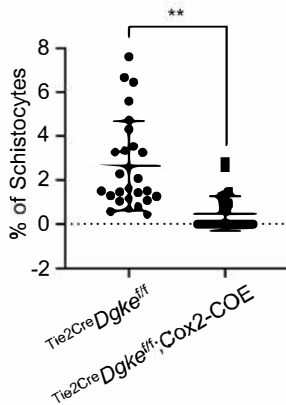**E**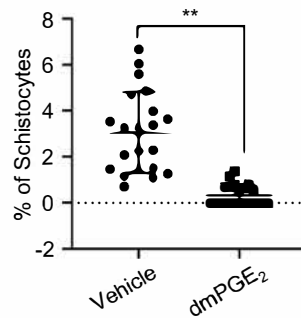

**Supplementary figure 3. A.** Quantification of the number of circulating schistocytes in *Tie2Cre Dgke<sup>fl/fl</sup>* and *Dgke<sup>fl/fl</sup>* controls at 6 months of age, expressed as percentage of schistocytes of total number of red blood cells per optical field. **B.** Serum LDH levels in *Tie2Cre Dgke<sup>fl/fl</sup>* mice compared to *Dgke<sup>fl/fl</sup>* controls at 2, 3, and 6 months of age,  $n=6$  mice per group. Percentage of circulating schistocytes in **C.** *Tie2Cre Dgke<sup>fl/fl</sup>* mice treated with VO-OHpic or vehicle as a control at 3 months of age; **D.** *Tie2Cre Dgke<sup>fl/fl</sup>;Cox2-COE* mice and *Tie2Cre Dgke<sup>fl/fl</sup>* controls at 3 months of age; **E.** *Tie2Cre Dgke<sup>fl/fl</sup>* mice treated with dmPGE<sub>2</sub> or vehicle as a control at 3 months of age. Data are presented as mean  $\pm$ SD.\*:  $P<0.05$ .\*\*:  $P<0.01$  (Student's t-test).

A

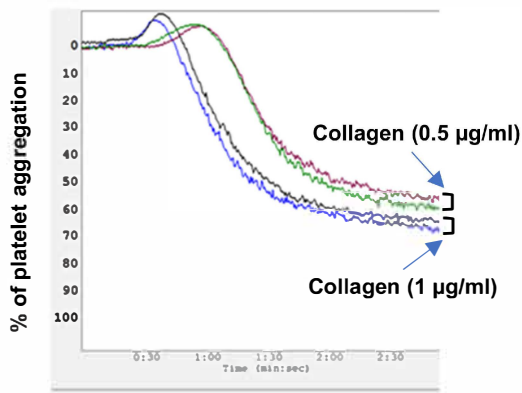

— WT  
— Endothelial specific DGKE KO

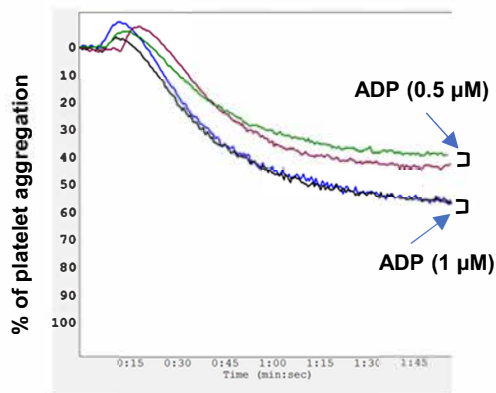

— WT  
— Endothelial specific DGKE KO

B

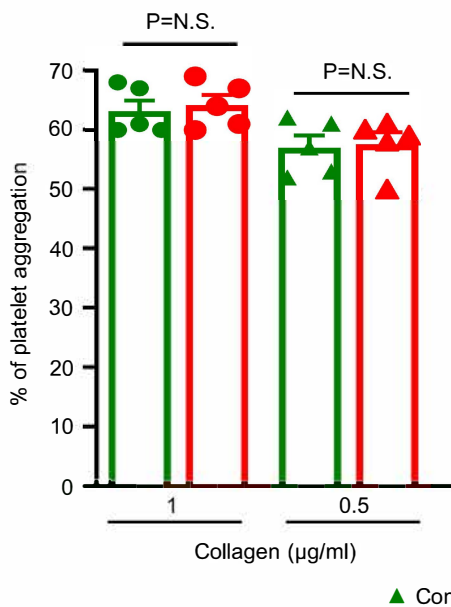

▲ Control

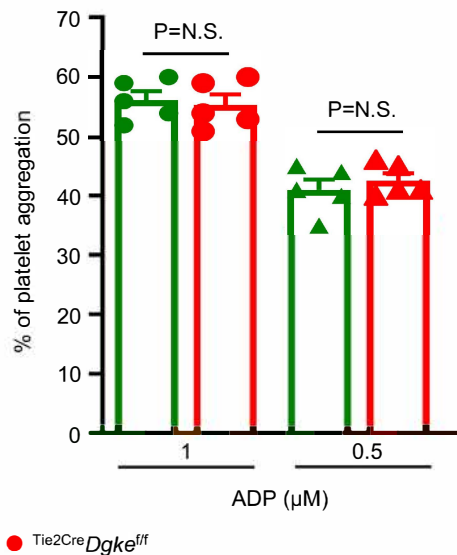

● Tie2Cre *Dgke*<sup>ff</sup>

**Supplementary figure 4. Aggregation studies of platelets from *Tie2Cre Dgke*<sup>ff</sup> and control mice. A.** Representative aggregation curves over time (minutes:seconds) of platelet rich plasmas from *Tie2Cre Dgke*<sup>ff</sup> and control mice, stimulated with two agonists, collagen and adenosine diphosphate (ADP), at sub-optimal and optimal concentrations. Aggregation is expressed as percent of change in light transmission, where 100% refers to transmittance through the blank sample (platelet poor plasma). **B.** Quantification of platelet aggregation from 5 independent experiments, expressed as % of change at maximum amplitude. Data are presented as mean  $\pm$  SEM. N.S.: non significant (one-way ANOVA followed by Tukey's multiple comparisons test).  $n=5$  per group.

**A**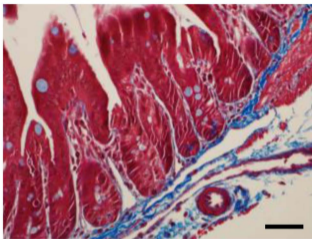**B**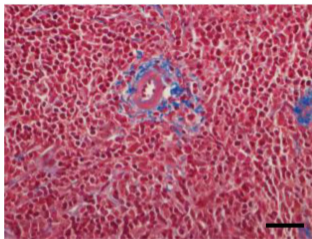**C**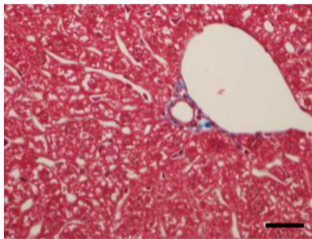

**Supplementary figure 5.** Representative bright field microscopy images of **A.** small intestine **B.** spleen and **C.** liver of  $Tie2^{Cre}Dgke^{ff}$  conditional knockout mice (H&E stain). No signs of TMA were detected in small arterioles in three mice. Scale bars are 100  $\mu$ m.

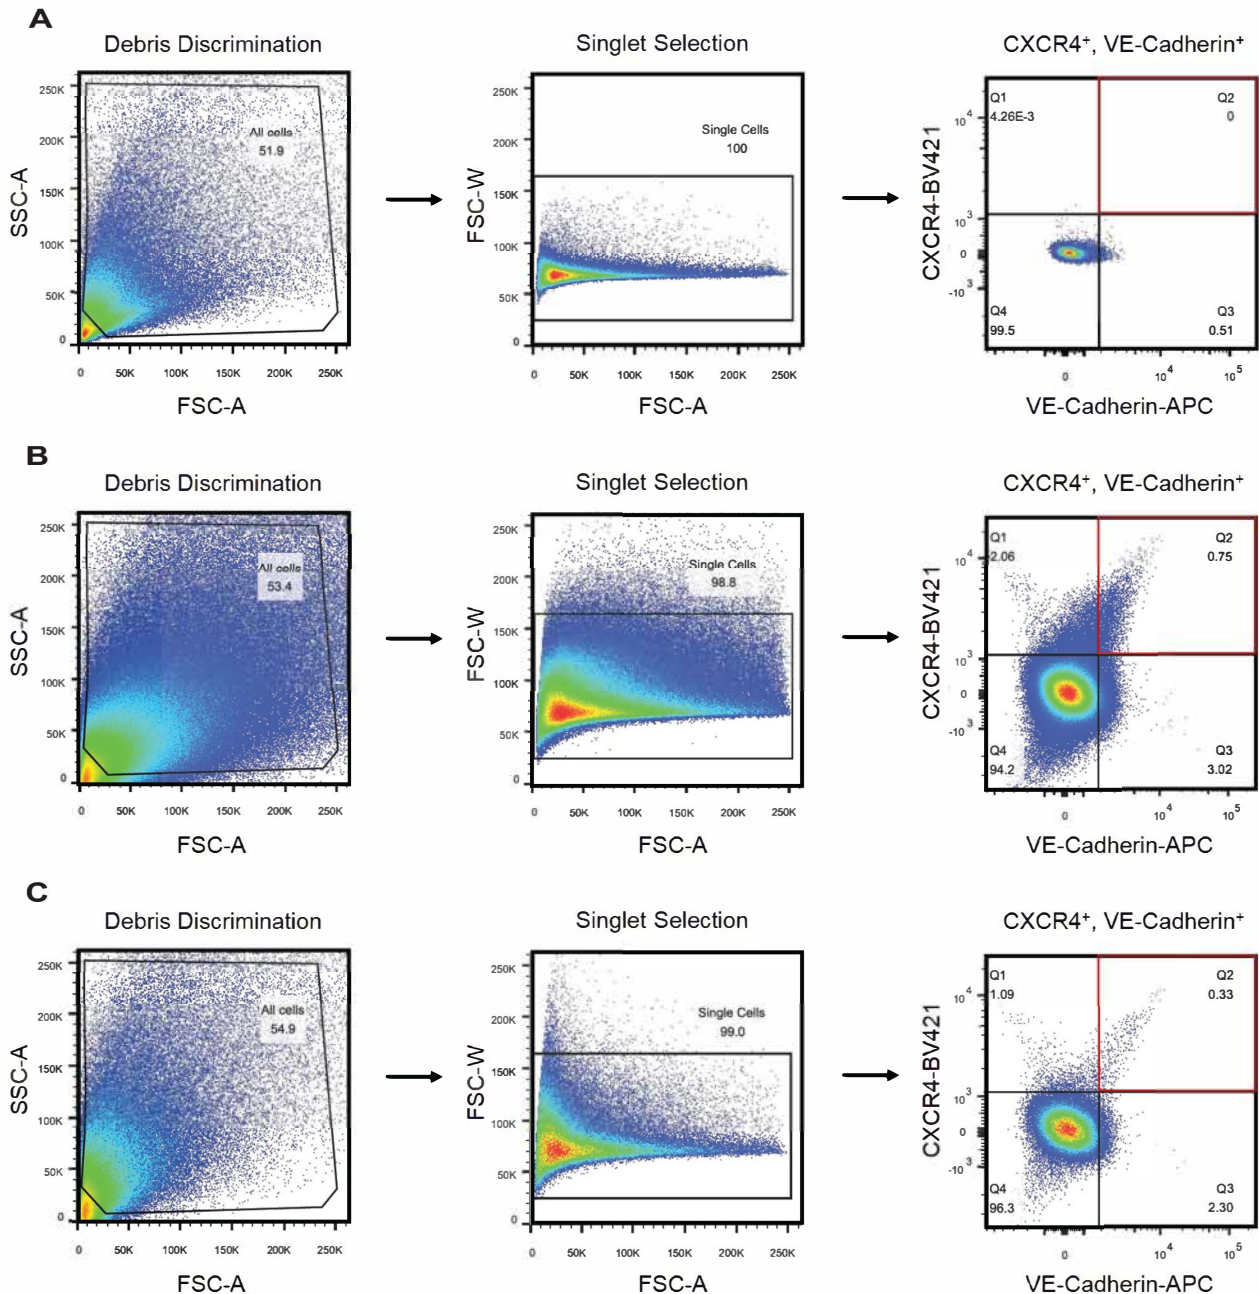

**Supplementary figure 6. Flow cytometry gating strategy adopted to generate the data reported in Figure 7, panels F-G and I-J. A.** Unstained control (no antibody, cells from control and *Tie2<sup>Cre</sup>Dgke<sup>flf</sup>* mice, 1:1 ratio). **B.** Control mice, and **C.** *Tie2<sup>Cre</sup>Dgke<sup>flf</sup>* mice. These experiments were performed in triplicate.

**A**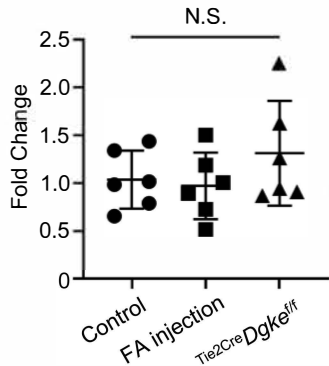**B**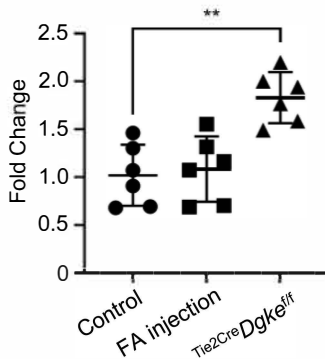

**Supplementary figure 7. MMP expression in kidney cortexes.** **A.** MMP9 and **B.** MMP2 expression in control, Tie2CreDgke<sup>ff</sup>, and wildtype mice with Folic Acid (FA) injection. Data are presented as mean ± SD. \*\*: P < 0.05. N.S.: non significant (Student's t-test). n = 6 per group.
